# Supplementary material
Source: PubMed Central journal article supplement (PMC8365779)
Supplement: NIHMS1729611-supplement-Supplemental_Material.pdf [file NIHMS1729611-supplement-Supplemental_Material.pdf]

## Supplemental Materials

Table 1

*Acronyms and Definitions*

| <i>Acronym</i> | <i>Definition</i>                  |
|----------------|------------------------------------|
| RED            | Racial/Ethnic Discrimination       |
| EDS            | Everyday Discrimination Scale      |
| REDI           | Racial/Ethnic Discrimination Index |
| IRT            | Item Response Theory               |
| ICC            | Intraclass Correlation             |
| IIF            | Item Information Function          |
| TIF            | Test Information Function          |

Table 2.

*Comparisons between Stucky's five-item-EDS and current revised-EDS items*

| Stucky et al. (2011)                                | Current Study                                          |
|-----------------------------------------------------|--------------------------------------------------------|
| People act like you are not as smart                | People act like you are not as smart                   |
| People act as if they think you are dishonest       | People act as if they are afraid of you                |
| You are called names or insulted                    | You are threatened or harassed                         |
| You are treated with less respect than others       | You are treated with less respect than others          |
| People act like they think they are better than you | You receive poorer service in restaurants or in stores |

Table 3

*Post-hoc Power Analysis of factorial invariance Test of EDS-AER and REDI across Ethnicity/Race and Gender*

| Invariance Model                                                              | Comparison Model | Number of Replications | $\Delta\chi^2$<br>( $\alpha = .05$ ) | AIC  | BIC  |
|-------------------------------------------------------------------------------|------------------|------------------------|--------------------------------------|------|------|
| EDS Attribution to Ethnicity/Race (EDS-AER): Invariance across Ethnicity/Race |                  |                        |                                      |      |      |
| 2-PL(P)                                                                       |                  | 500                    |                                      |      |      |
| Loading                                                                       | Baseline         | 500                    | 0.82                                 | 0.92 | 1.00 |
| Loading + Intercept                                                           | Loading          | 500                    | 0.96                                 | 0.94 | 1.00 |
| EDS Attribution to Ethnicity/Race (EDS-AER): Invariance across Gender         |                  |                        |                                      |      |      |
| 2-PL(P)                                                                       |                  | 500                    |                                      |      |      |
| Loading                                                                       | Baseline         | 500                    | 0.83                                 | 0.86 | 1.00 |
| Loading + Intercept                                                           | Loading          | 500                    | 0.03                                 | 0.02 | 0.85 |
| Racial/Ethnic Discrimination Index (REDI): Invariance across Ethnicity/Race   |                  |                        |                                      |      |      |
| 2-PL(P)                                                                       |                  | 478                    |                                      |      |      |
| Partial Loading                                                               | Baseline         | 478                    | 0.82                                 | 0.79 | 0.89 |
| Partial Loading + Intercept                                                   | Partial Loading  | 478                    | 0.93                                 | 0.97 | 1.00 |
| Racial/Ethnic Discrimination Index (REDI): Invariance across Gender           |                  |                        |                                      |      |      |
| 2-PL(P)                                                                       |                  | 500                    |                                      |      |      |
| Loading                                                                       | 2-PL(P)          | 500                    | 0.89                                 | 0.79 | 0.86 |
| Loading + Intercept                                                           | Loading          | 500                    | 0.91                                 | 0.92 | 1.00 |

*Note.*  $\Delta\chi^2$  is the likelihood ratio test.
